# Supplementary material for: Common Variation at 1q24.1 (ALDH9A1) Is a Potential Risk Factor for Renal Cancer
Source: PLOS journal article supplement (doi:10.1371/journal.pone.0122589), 2015-03-31
Supplement: S6 (10.1371/journal.pone.0122589.s006) [file journal.pone.0122589.s006]

Supplementary Table S2: UK & NCI meta-analysis for all variants taken through to the replication stage.

| locus   | nearest gene(s) <sup>a</sup>           | variant     | position<br>(hg19) | alleles <sup>b</sup> |           | UK        |              |      |              |                    |      | NCI       |              |      |             |                    |      | meta analysis <sup>c</sup> |                    |                    |                  |
|---------|----------------------------------------|-------------|--------------------|----------------------|-----------|-----------|--------------|------|--------------|--------------------|------|-----------|--------------|------|-------------|--------------------|------|----------------------------|--------------------|--------------------|------------------|
|         |                                        |             |                    |                      |           | RAF cases | RAF controls | OR   | CI           | P <sub>trend</sub> | IS   | RAF cases | RAF controls | OR   | CI          | P <sub>trend</sub> | IS   | OR                         | P <sub>fixed</sub> | I <sup>2</sup> (%) | P <sub>het</sub> |
| 1q24.1  | MGST3,<br>ALDH9A1, TMC01,<br>LOC440700 | rs3845536   | 165,650,787        | C                    | T         | 0.68      | 0.64         | 1.16 | (1.05- 1.29) | 4.61E-03           | 0.99 | 0.68      | 0.62         | 1.30 | (1.17-1.44) | 9.40E-07           | 0.99 | 1.23                       | 4.81E-08           | 56                 | 0.13             |
|         |                                        | rs11583089  | 165,656,537        | A                    | T         | 0.72      | 0.68         | 1.19 | (1.08- 1.33) | 9.10E-04           | 1.00 | 0.71      | 0.67         | 1.22 | (1.10-1.36) | 2.23E-04           | 0.99 | 1.21                       | 7.26E-07           | 0                  | 0.77             |
|         |                                        | rs10918242  | 165,656,600        | A                    | G         | 0.67      | 0.63         | 1.16 | (1.05- 1.29) | 3.38E-03           | 1.00 | 0.67      | 0.61         | 1.27 | (1.15-1.41) | 5.28E-06           | 0.99 | 1.22                       | 1.29E-07           | 31                 | 0.23             |
|         |                                        | rs34072474  | 165,656,829        | GA                   | G         | 0.67      | 0.63         | 1.16 | (1.05- 1.29) | 3.45E-03           | 1.00 | 0.67      | 0.61         | 1.27 | (1.15-1.41) | 4.86E-06           | 0.99 | 1.22                       | 1.24E-07           | 33                 | 0.22             |
|         |                                        | rs12036561  | 165,658,994        | A                    | G         | 0.67      | 0.63         | 1.17 | (1.05- 1.29) | 2.99E-03           | 1.00 | 0.67      | 0.61         | 1.27 | (1.15-1.41) | 4.93E-06           | 0.98 | 1.22                       | 1.06E-07           | 29                 | 0.24             |
|         |                                        | rs7541817   | 165,659,714        | C                    | T         | 0.67      | 0.63         | 1.16 | (1.05- 1.28) | 4.47E-03           | 1.00 | 0.67      | 0.61         | 1.27 | (1.15-1.41) | 5.36E-06           | 0.98 | 1.21                       | 1.84E-07           | 37                 | 0.21             |
|         |                                        | rs4307543   | 165,660,029        | G                    | T         | 0.67      | 0.63         | 1.16 | (1.05- 1.28) | 4.46E-03           | 1.00 | 0.67      | 0.61         | 1.27 | (1.15-1.41) | 5.72E-06           | 0.98 | 1.21                       | 1.94E-07           | 36                 | 0.21             |
|         |                                        | rs7542184   | 165,660,041        | C                    | A         | 0.72      | 0.68         | 1.19 | (1.07- 1.32) | 1.19E-03           | 1.00 | 0.71      | 0.67         | 1.23 | (1.10-1.36) | 1.86E-04           | 0.98 | 1.21                       | 8.17E-07           | 0                  | 0.70             |
| 2p24.3  |                                        | rs72698083  | 165,660,794        | G                    | C         | 0.72      | 0.68         | 1.19 | (1.07- 1.32) | 1.17E-03           | 1.00 | 0.71      | 0.67         | 1.23 | (1.10-1.36) | 1.85E-04           | 0.98 | 1.21                       | 8.00E-07           | 0                  | 0.70             |
|         |                                        | rs1560445   | 15,237,682         | G                    | A         | 0.73      | 0.68         | 1.24 | (1.11- 1.38) | 1.00E-04           | 0.95 | 0.73      | 0.71         | 1.18 | (1.06-1.32) | 2.34E-03           | DT   | 1.21                       | 9.28E-07           | 0                  | 0.57             |
|         |                                        | rs1835468   | 15,239,211         | G                    | A         | 0.73      | 0.68         | 1.24 | (1.11- 1.38) | 9.40E-05           | 0.96 | 0.73      | 0.71         | 1.19 | (1.07-1.33) | 1.56E-03           | 1.00 | 1.22                       | 5.65E-07           | 0                  | 0.63             |
|         |                                        | rs13002707  | 15,241,629         | T                    | A         | 0.73      | 0.69         | 1.23 | (1.11- 1.37) | 1.15E-04           | 0.97 | 0.73      | 0.71         | 1.19 | (1.06-1.32) | 2.08E-03           | 1.00 | 1.21                       | 9.21E-07           | 0                  | 0.61             |
|         |                                        | rs7573899   | 15,241,637         | T                    | C         | 0.73      | 0.69         | 1.23 | (1.11- 1.37) | 1.21E-04           | 0.97 | 0.73      | 0.71         | 1.19 | (1.07-1.33) | 1.96E-03           | 1.00 | 1.21                       | 9.05E-07           | 0                  | 0.63             |
|         |                                        | rs10196061  | 15,244,929         | C                    | T         | 0.73      | 0.69         | 1.23 | (1.11- 1.37) | 1.37E-04           | 0.97 | 0.73      | 0.71         | 1.19 | (1.07-1.33) | 1.80E-03           | 1.00 | 1.21                       | 9.16E-07           | 0                  | 0.66             |
|         |                                        | rs13385654  | 15,252,659         | T                    | C         | 0.72      | 0.68         | 1.25 | (1.12- 1.39) | 4.28E-05           | 0.97 | 0.71      | 0.69         | 1.19 | (1.07-1.33) | 1.34E-03           | 0.99 | 1.22                       | 2.36E-07           | 0                  | 0.57             |
| 2p12    | REG3G                                  | 2-79243058  | 79,243,058         | AACAG                | A         | 0.02      | 0.01         | 3.87 | (1.99- 7.53) | 6.53E-05           | 0.67 | 0.01      | 0.01         | 4.41 | (2.00-9.71) | 2.33E-04           | 0.57 | 4.09                       | 5.81E-08           | 0                  | 0.81             |
| 2q37.1  | ITM2C, GPR55,<br>LOC151484             | rs181676155 | 231,787,699        | A                    | G         | 0.01      | 0.01         | 7.46 | (2.92-19.09) | 2.75E-05           | 0.59 | 0.01      | 0.01         | 3.05 | (1.55-6.00) | 1.22E-03           | 0.71 | 4.14                       | 3.88E-07           | 56                 | 0.13             |
| 5p13.3  | PDZD2                                  | rs10054504  | 32,000,483         | T                    | C         | 0.14      | 0.11         | 1.41 | (1.21- 1.65) | 1.29E-05           | DT   | 0.14      | 0.12         | 1.24 | (1.07-1.44) | 4.11E-03           | DT   | 1.32                       | 3.68E-07           | 28                 | 0.24             |
| 6q14.3  |                                        | rs78793258  | 85,749,252         | G                    | A         | 0.09      | 0.06         | 1.43 | (1.17- 1.73) | 3.61E-04           | 0.98 | 0.10      | 0.08         | 1.40 | (1.17-1.68) | 2.31E-04           | 0.98 | 1.41                       | 2.98E-07           | 0                  | 0.89             |
|         |                                        | rs74439948  | 85,766,266         | G                    | A         | 0.09      | 0.06         | 1.41 | (1.16- 1.72) | 4.60E-04           | 0.99 | 0.10      | 0.08         | 1.37 | (1.14-1.63) | 5.95E-04           | 0.99 | 1.39                       | 9.66E-07           | 0                  | 0.80             |
|         |                                        | rs7765284   | 85,777,822         | A                    | C         | 0.09      | 0.06         | 1.42 | (1.17- 1.72) | 3.73E-04           | DT   | 0.10      | 0.08         | 1.36 | (1.14-1.62) | 6.86E-04           | DT   | 1.39                       | 9.22E-07           | 0                  | 0.75             |
| 10q21.2 | ANK3                                   | rs149748210 | 62,066,205         | A                    | ATATATATC | 0.47      | 0.43         | 1.26 | (1.12- 1.41) | 1.05E-04           | 0.73 | 0.49      | 0.49         | 1.20 | (1.07-1.34) | 1.93E-03           | 0.76 | 1.23                       | 8.12E-07           | 0                  | 0.57             |
| 11q23.3 |                                        | rs113878013 | 114,385,626        | C                    | T         | 0.01      | 0.00         | 4.67 | (2.13-10.22) | 1.14E-04           | 0.78 | 0.01      | 0.01         | 2.98 | (1.58-5.60) | 7.25E-04           | 0.78 | 3.56                       | 4.34E-07           | 0                  | 0.38             |
|         |                                        | rs7942540   | 114,815,288        | A                    | G         | 0.02      | 0.01         | 5.13 | (2.41-10.91) | 2.24E-05           | 0.48 | 0.02      | 0.01         | 2.89 | (1.51-5.53) | 1.42E-03           | 0.60 | 3.69                       | 2.16E-07           | 21                 | 0.26             |

RAF = risk allele frequency, OR = odds ratio, CI = confidence interval, IS = imputation accuracy score (info score from IMPUTEv2), DT = directly typed

<sup>a</sup> nearest gene(s) = genes within 50kb of the variant with the lowest meta analysis P

<sup>b</sup> alleles are given as risk & other allele

<sup>c</sup> all meta analysis results are for an inverse variance weighted, fixed effect model
